# Supplementary material for: Restriction-modification mediated barriers to exogenous DNA uptake and incorporation employed by Prevotella intermedia
Source: PLoS One. 2017 Sep 21;12(9):e0185234. doi: 10.1371/journal.pone.0185234 (PMC5608340; doi:10.1371/journal.pone.0185234)
Supplement: S1 Table — Primers are shown in 5’ to 3’ orientation. (XLSX) [file pone.0185234.s009.xlsx]

## Sheet: Table S1
Supplementary Table S1: Oligonucleotides used in this study
	Primer name	Direction	Primer sequence (5'-3')	Characteristics
	Prevotella intermedia ATCC25611Fgenomic DNA regions for bisulfite sequence analysis
	GATCregion1_BS	Forward	AATTGATTTTTAGAATAAGGATTTA	-
		Reverse	ACTTCATCAACAATAAATAAAAAAAC	-
	GATCregion2_BS	Forward	GTGGTTGTAATAAATAATGGTAAGATGATT	-
		Reverse	ACAATTAAAATCCAATTCATAAAAAAAC	-
	GCWGCregion1_BS	Forward	TTTTAAGTTTGTTTGTATTAGTTTTAG	-
		Reverse	AAAAAAATATTCCTACTTTAAAAAC	-
	GCWGCregion2_BS	Forward	GTAATTGTTAGTTTTGTTTTTTTT	-
		Reverse	ATATAATTTCACTTCAAATCTACTTTATAC	-
	Prevotella intermedia gene constructs cloned to pRRS (Escherichia coli ER2796) for SMRT sequencing analysis
	M.Pin17FORF945P and S.Pin17FORF945P	Forward	TTATTACCTGCAGGAAATAAGGTTAACATATGGCAATAAAGAAATCACAGTTAT	SbfI site
		Reverse	TTATTAGGATCCTTAGTCATTTCTAACATTAGGTGCAAAG	BamHI site
	M.Pin25611FORF7790P plus S.Pin25611ORFAP (SOEing)	Forward A	TTATTACCTGCAGGAAATAAGGTTAACATATGAGCGAAGAATTACAACAGAAACT	SbfI site
		Reverse A	TAACTCCGAAACCTTACAGTTTTACATTATTCCCAATTCTTTCAAATAAC	(overhang)
		Forward B	AACTGTAAGGTTTCGGAGTTATTGGACTTCTATTCAACAAACTCACTTAG	(overhang)
		Reverse B	TTATTAGGATCCTCATATGAACATCTGACGGAGCAAA	BamHI site
	M.Pin25611FORF7790P plus S.Pin25611ORFBP (SOEing)	Forward A	TTATTACCTGCAGGAAATAAGGTTAACATATGAGCGAAGAATTACAACAGAAACT	SbfI site
		Reverse A	ACCATAATCGAGCCCTGTTGCTTACATTATTCCCAATTCTTTCAAATAAC	(overhang)
		Forward B	GCAACAGGGCTCGATTATGGTATGAACGCTGCTGCGAAATC	(overhang)
		Reverse B	TTATTAGGATCCCTATATCTGGAGATGAATAATCTTGTACC	BamHI site
	M.Pin17FORF12075P plus S2.Pin17FORF12075P	Forward	TTATTACCTGCAGGAAATAAGGTTAACATATGAGCGAGGAATTACAACAG	SbfI site
		Reverse	TTATTAGGATCCTTATATGAACATTTGGCGAAGTAG	BamHI site
	M.Pin17FORF12075P plus S2.Pin17FORF12075P plus S1.Pin17FORF12075P	Forward	TTATTACCTGCAGGAAATAAGGTTAACATATGAGCGAGGAATTACAACAG	SbfI site
		Reverse	TTATTAGGATCCGGTACATAATAATTAGAGAAACGTATTAACTAATG	BamHI site
	M.Pin25611FORF11225P	Forward	TTATTACCTGCAGGAAATAAGGTTAACATATGGTACAGGAATCCAATGCAG	SbfI site
		Reverse	TTATTATGATCATCATCTATTATCCTTCTTAAATTTAGCATACG	BclI site
	Pin25611FORF11230 plus M.Pin25611FORF11225	Forward	TTATTACCTGCAGGAAATAAGGTTAACATATGGATAAGAATTTCAACCG	SbfI site
		Reverse	TTATTATGATCATCATCTATTATCCTTCTTAAATTTAGC	BclI site
	Pin25611FORF11230 plus M.Pin25611FORF11225 plus Pin25611FORF11220	Forward	TTATTACCTGCAGGAAATAAGGTTAACATATGGATAAGAATTTCAACCG	SbfI site
		Reverse	TTATTATGATCATTATTTATTCCACTTTTCGATTTC	BclI site
	Pin17FORF9590	Forward	TTATTACTGCAGGAAATAAGGTTAACATATGAATTACAAAGAGATTATTGAATCAAAATA	PstI site
		Reverse	TTATTAGGATCCTTAGAAAGCTCCCTGTTCTATAAAATTAAGC	BamHI site
	Pin17FORF9595P	Forward	TTATTACCTGCAGGAAATAAGGTTAACATATGCGGCAACAAGATACCATT	SbfI site
		Reverse	TTATTAGGATCCTCAAATCCGATATGTTGTTATATATTC	BamHI site
	Pin17FORF950 and Pin17FORF9595P	Forward	TTATTACTGCAGGAAATAAGGTTAACATATGAATTACAAAGAGATTATTGAATCAAAATA	PstI site
		Reverse	TTATTAGGATCCGCGTCTGGACTATCAAGGACAAC	BamHI site
	Prevotella intermedia ATCC25611F and 17F genes cloned to pRRS (Escherichia coli ER2796) for GATC restriction enzyme assay
	M.Pin25611FII	Forward	TTATTACCTGCAGGAAATAAGGTTAACATATGGCAAAAGCAAGACCTTTTAT	SbfI site
		Reverse	TTAGGATCCTTATGAAGATAGTGCTTTATTTAAACCATAG	BamHI site
	M.Pin25611ORFEP (Orphan)	Forward	TTATTACCTGCAGGAAATAAGGTTAACATATGCGCATAATAACAGGACAGTTC	SbfI site
		Reverse	TTAGGATCCTATCGGAAGATAGAGAAGTTCACGC	BamHI site
	M2.Pin17FIIP (Orphan M2)	Forward	TTATTACCTGCAGGAAATAAGGTTAACATATGGCAAAAGCAAGACCTTTTAT	SbfI site
		Reverse	TTAGGATCCTATAAAATGACAGCAATACCTGTTGTAGCAC	BamHI site
