# Supplementary material for: Restriction-modification mediated barriers to exogenous DNA uptake and incorporation employed by Prevotella intermedia
Source: PLoS One. 2017 Sep 21;12(9):e0185234. doi: 10.1371/journal.pone.0185234 (PMC5608340; doi:10.1371/journal.pone.0185234)
Supplement: S2 Table — a The modified base within each motif is bolded while the modified base in the complementary strand is italicized. b Novel recognition sequences. c Detected only after tet-assisted SMRT library preparation. d The total number includes motifs occurring on the “+” and “–” strands. e Low percentage detected, due to m5C modification. (XLSX) [file pone.0185234.s010.xlsx]

## Sheet: Table S2
Supplementary Table S2: Methylated motifs identified in Prevotella intermedia ATCC-25611F and 17F
Prevotella intermedia ATCC-25611F
No	R-M System Type	Motif a	Modified Position	Modification Type	# of Motifs in Genome d	# of Motifs Detected	% Motifs Detected	Partner Motif
A	II	GATC	2	m6A	1108	1103	0.9955	GATC
B1	II	CATCC	2	m6A	802	800	0.9975	GGATG
B2	II	GGATG	3	m6A	802	798	0.995	CATCC
C1	I/II	GTANNNNCTC b	3	m6A	772	763	0.9883	GAGNNNNTAC
C2	I/II	GAGNNNNTAC b	2	m6A	772	762	0.987	GTANNNNCTC
D3	I	AGYNNNNNRTTC b	1	m6A	1315	1286	0.9779	GAAYNNNNNRCT
D2	I	GAAYNNNNNRCT b	3	m6A	1315	1260	0.9582	AGYNNNNNRTTC
E	I	CAANNNNNNCTG	3	m6A	1773	1573	0.8872	CAGNNNNNNTTG
F	I	CAGNNNNNNTTG	2	m6A	1773	1178	0.6644	CAANNNNNNCTG
G	I	DAGYNNNNNCTG	2	m6A	1636	1184	0.7237	-
H	II	GCAGC	3	m6A	7676	7342	0.9565	-
I	II	GCAGC c	2	m5C	1741	555	31.88% e	-
Prevotella intermedia 17F
No	R-M System Type	Motif a	Modified Position	Modification Type	# of Motifs in Genome d	# of Motifs Detected	% Motifs Detected	Partner Motif
A	II	GATC	2	m6A	1168	1168	1	GATC
B1	II	CATCC	2	m6A	840	840	1	GGATG
B2	II	GGATG	3	m6A	840	840	1	CATCC
C1	I	GAGNNNNNNTTA b	2	m6A	717	717	1	TAANNNNNNCTC
C2	I	TAANNNNNNCTC b	3	m6A	717	717	1	TGAGNNNNNNTTA
D1	I	GAGNNNNNNTGG	2	m6A	585	584	0.9983	CCANNNNNNCTC
D2	I	CCANNNNNNCTC	3	m6A	585	584	0.9983	GAGNNNNNNTGG
E	II	GGYGAB b	5	m6A	5871	5799	0.9877	-
F	II	CCNYAG b	5	m6A	5277	4844	0.9179	-
G	II	GGNYAG b	5	m6A	5004	3121	0.6237	-
a The modified base within each motif is bolded while the modified base in the complementary strand is italicized.
b Novel recognition sequences.
c Detected only after tet-assisted SMRT library preparation
d The total number includes motifs occurring on the “+” and “–” strands.
e Low percentage detected, due to m5C modification.
