# Supplementary material for: Restriction-modification mediated barriers to exogenous DNA uptake and incorporation employed by Prevotella intermedia
Source: PLoS One. 2017 Sep 21;12(9):e0185234. doi: 10.1371/journal.pone.0185234 (PMC5608340; doi:10.1371/journal.pone.0185234)
Supplement: S3 Table — motifString: Detected motif sequence. centerPos: Position in motif of modification. fraction: Fraction of instances of this motif with modification Quality Value (QV) above the QV threshold. nDetected: Number of instances of this motif with above threshold. nGenome: Number of instances of this motif in reference sequence. groupTag: A string identifying the motif grouping. For paired motifs this is “/”, For unpaired motifs this equals motifString. partnerMotifString: motifString of paired motif (motif with reverse-complementary motifString). meanScore: Mean Modification QV of detected instances. meanIpdRatio: Mean interpulse duration (IPD) ratio of detected instances. meanCoverage: Mean coverage of detected instances. objectiveScore: Objective score of this motif in the motif finder algorithm. (XLSX) [file pone.0185234.s011.xlsx]

## Sheet: Table S3
Supplementary Table S3: PacBio SMRT sequence basemod motif summary of recombinant E.coli ER2796 clones expressing P. intermedia R-M system methyltranserase genes
Prevotella intermedia 17F
M.Pin17FIV plus S.Pin17FIV
motifString	centerPos	modificationType	fraction	nDetected	nGenome	groupTag	partnerMotifString	meanScore	meanIpdRatio	meanCoverage	objectiveScore
CYANNNNNNCTC	2	m6A	0.881315	1448	1643	CYANNNNNNCTC/GAGNNNNNNTRG	GAGNNNNNNTRG	54.2051	3.33989	72.4952	70053
GAGNNNNNNTRG	1	m6A	0.842361	1384	1643	CYANNNNNNCTC/GAGNNNNNNTRG	CYANNNNNNCTC	54.1842	3.44538	72.099	64262.5
GAGNNNNNNAGG	1	m6A	0.64486	483	749	GAGNNNNNNAGG		47.8033	3.00745	71.8758	15556.9
VTCABNNNNNCTC	3	m6A	0.267918	157	586	VTCABNNNNNCTC		42.9427	2.7642	73.4076	2060.59
M.Pin17FV plus S.Pin17FV
motifString	centerPos	modificationType	fraction	nDetected	nGenome	groupTag	partnerMotifString	meanScore	meanIpdRatio	meanCoverage	objectiveScore
GAGNNNNNNTTA	1	m6A	0.868421	957	1102	GAGNNNNNNTTA/TAANNNNNNCTC	TAANNNNNNCTC	54.1756	5.80668	35.7555	45663.9
TAANNNNNNCTC	2	m6A	0.853902	941	1102	GAGNNNNNNTTA/TAANNNNNNCTC	GAGNNNNNNTTA	52.7205	5.7037	35.5058	43036.4
M.Pin17FV and S.Pin17FV and S.Pin17FORF12055P
motifString	centerPos	modificationType	fraction	nDetected	nGenome	groupTag	partnerMotifString	meanScore	meanIpdRatio	meanCoverage	objectiveScore
GAGNNNNNNTTA	1	m6A	0.317604	350	1102	GAGNNNNNNTTA/TAANNNNNNCTC	TAANNNNNNCTC	40.8714	3.77394	45.2429	5095.49
TAANNNNNNCTC	2	m6A	0.285844	315	1102	GAGNNNNNNTTA/TAANNNNNNCTC	GAGNNNNNNTTA	40.127	3.55565	45.273	4095.09
M. Pin17FIII
motifString	centerPos	modificationType	fraction	nDetected	nGenome	groupTag	partnerMotifString	meanScore	meanIpdRatio	meanCoverage	objectiveScore
GGYGAB	4	m6A	0.976593	22363	22899	GGYGAB		74.1441	4.8842	55.3491	1.62311e+06
ACGGYGAAA	6	m6A	0.357977	92	257	ACGGYGAAA		42.5652	2.90804	59.2391	1553.5
GGYGAAB	4	m6A	0.231266	1469	6352	GGYGAAB		42.9238	2.90645	62.1205	16881.8
M. Pin17FIII plus Pin17FORF9595P
motifString	centerPos	modificationType	fraction	nDetected	nGenome	groupTag	partnerMotifString	meanScore	meanIpdRatio	meanCoverage	objectiveScore
GGNNBVNYD	0	modified_base	0.0166595	1754	105285	GGNNBVNYD		36.1431	2.54297	80.0199	1590.57
M. Pin17FIII plus Pin17FORF9595P plus Pin17FORF9600P
motifString	centerPos	modificationType	fraction	nDetected	nGenome	groupTag	partnerMotifString	meanScore	meanIpdRatio	meanCoverage	objectiveScore
GGYGAB	4	m6A	0.125508	2874	22899	GGYGAB		36.7067	6.03463	17.1378	16294.3
Prevotella intermedia ATCC25611F
C.Pin25611FIVP plus M.Pin25611FIV
motifString	centerPos	modificationType	fraction	nDetected	nGenome	groupTag	partnerMotifString	meanScore	meanIpdRatio	meanCoverage	objectiveScore
CNGATGCGGNNNNA	2	modified_base	0.177474	52	293	CNGATGCGGNNNNA		44	2.17519	76.4231	482.701
C.Pin25611FIVP plus M.Pin25611FIV plus S.Pin25611FIVP
motifString	centerPos	modificationType	fraction	nDetected	nGenome	groupTag	partnerMotifString	meanScore	meanIpdRatio	meanCoverage	objectiveScore
GTANNNNCTC	2	m6A	0.992585	937	944	GTANNNNCTC/GAGNNNNTAC	GAGNNNNTAC	75.3885	5.45678	58.2946	70167.4
GAGNNNNTAC	1	m6A	0.988348	933	944	GTANNNNCTC/GAGNNNNTAC	GTANNNNCTC	74.2529	5.22243	58.1383	68551
GAGVANDRAC	1	m6A	0.352273	186	528	GAGVANDRAC		50.5054	4.28199	60.0376	3673.18
