# Supplementary material for: Restriction-modification mediated barriers to exogenous DNA uptake and incorporation employed by Prevotella intermedia
Source: PLoS One. 2017 Sep 21;12(9):e0185234. doi: 10.1371/journal.pone.0185234 (PMC5608340; doi:10.1371/journal.pone.0185234)
Supplement: S4 Table — (XLSX) [file pone.0185234.s012.xlsx]

## Sheet: Table S4
	Supplementary Table S4: CRISPR systems spacers of P. intermedia ATCC-25611F
	Chromosome I
	Array 1 602246..606679		**** Predicted by CRISPRDetect 2.1 ***
	Array_Orientation: Forward
	Spacer Number	Position	Repeat Length	% id to consensus	Spacer Length	Repeat_Sequence	Spacer_Sequence
	==========	==========	======	======	======	===============================================	===============================
			47	99.6	30	GTTGTGATTAGCTTTAAAATTAGTATCTTTGCATTGGTAAATACAAC
n=39	==========	==========	======	======	======	===============================================	===============================
		606533	47	100.0	0	...............................................
1	1	606456	47	100.0	30	...............................................	ATAACACTCTGAAGCCTGATGAAAAGTAGG
2	2	606379	47	100.0	30	...............................................	TTGATATCATTGGTATTTTTTTCATAATTT
3	3	606302	47	100.0	30	...............................................	AATAGAGAAATCACCAACCTTTAAGAAACT
4	4	606225	47	100.0	30	...............................................	AAGGCGGTCGAGCGACCGCTTGATGCGTGC
5	5	606148	47	100.0	30	...............................................	TTCACCATAAATAAATTAAATATCCATATA
6	6	606070	47	100.0	31	...............................................	ACTCTGAAAAGAATAGACCTTTCAGAGGCTC
7	7	605993	47	100.0	30	...............................................	AATGGATAGCTAAATACATGGCATTCATTC
8	8	605916	47	100.0	30	...............................................	TCTACATATATCTACTACATTAAACTATCT
9	9	605839	47	100.0	30	...............................................	TTCAAAGGAGTGAGTTTCAAACGTTTAGCC
10	10	605762	47	100.0	30	...............................................	CATCAAAGTCAGCGTTTGGGAAGTCGAAAC
11	11	605685	47	100.0	30	...............................................	CCTTAGAGTCTACATAGGTACGAGCAAACC
12	12	605608	47	100.0	30	...............................................	GATATTAACGCAAGCGATTTCAACGATGAC
13	13	605531	47	100.0	30	...............................................	CAATTTGTTTTCCAACACTCCACTATCCAT
14	14	605454	47	100.0	30	...............................................	ATCATTCATTTTCTTAAGTGTATCGATGGT
15	15	605377	47	100.0	30	...............................................	TATACCATTATCACAAACAATATTTAATAT
16	16	605300	47	100.0	30	...............................................	GTTCTAAATGAGAAATAAATGCGTTTAATT
17	17	605223	47	100.0	30	...............................................	ATTTGAAGATTATAATATATCTGATGAAAA
18	18	605146	47	100.0	30	...............................................	ATAATCACCAGATAAGCTTGTATCTACAGG
19	19	605070	47	100.0	29	...............................................	TGCTGCGTCCTACTTGACTTGCATTTGTA
20	20	604993	47	100.0	30	...............................................	TTGATAAGTATAAAGACATGCCAAATGTGG
21	21	604916	47	100.0	30	...............................................	CTCGGCAGTCATTTCAACTTTTACTTTGTC
22	22	604839	47	100.0	30	...............................................	GAACTCCAGTACAACAAACGCATCATAGCC
23	23	604762	47	100.0	30	...............................................	CCTTGCCCACTGCATCGCATTGATGCCGTC
24	24	604685	47	100.0	30	...............................................	TCGAAGCCTACGCTCGCCACCGCACGGTGG
25	25	604609	47	100.0	29	...............................................	CCCATAACTATTTTGTTTTGTCGTTTCCT
26	26	604533	47	100.0	29	...............................................	AGGCTTCAGAGTGTTATGTAGCTGTAACA
27	27	604456	47	100.0	30	...............................................	CAATTCGGCACAGAAAAATCTTCATAAAGG
28	28	604379	47	100.0	30	...............................................	GTTCCTTTGAGAGTATGGCCTTGCAAAAGC
29	29	604299	46	89.4	30	T..A....C.-.G..................................	TGAATTAAAAGAACGTGGAATAATGCCAAG
		==========	======	======	======	===============================================	===============================
30	30	603115	47	100.0	30	...............................................	ACAAAGACGCTGAAAATAACCGTCTTGCCT
31	31	603038	47	100.0	30	...............................................	GGGGGCTATACACGCCCCCACGTTGTTTTA
32	32	602961	47	100.0	30	...............................................	AACTTCCATTTTCATAATGTGTTACTCCTT
33	33	602884	47	100.0	30	...............................................	CCCTCTGAAATTTTATTGAAAACTATACAC
34	34	602806	47	100.0	31	...............................................	GATATCCTAGGTGCTTATAATGATGCCAGAG
35	35	602729	47	100.0	30	...............................................	AACGTATTCAGTACCTAAAAAACCTAATAC
36	36	602652	47	100.0	30	...............................................	CCAATGATGTGAGCGTGTCTACAGCCGTGT
37	37	602575	47	100.0	30	...............................................	TTGTTGTGTAAAGGAATCGGGTTAAAACCC
38	38	602498	47	100.0	30	...............................................	TAGCAATGGTGCTATAATATCCTCCAGGCT
39	39	602421	47	97.9	30	.....................................C.........	ACCCACAATAAGAAGAACTACTATCTGCCT
		603192	47	100.0	0	...............................................	|
		==========	======	======	======	===============================================	===============================
		==========	======	======	======	===============================================	===============================
	Chromosome II
	Array 1 188069-188893		**** Predicted by CRISPRDetect 2.1 ***
	Array_Orientation: Forward
	Spacer Number	Position	Repeat Length	% id to consensus	Spacer Length	Repeat_Sequence	Spacer_Sequence
Consensus	n=12		36	98.5	30	GTTGTTTTTACCTTGCAAACAGCAGGCAGATGCAAC
	==========	==========	======	======	======	====================================	==============================
1	40	188069	36	94.4	30	.......G.G..........................	GTGGCGGCGTTAGCATTAATATATTACACC
2	41	188135	36	100.0	29	....................................	TTACTCAGGTAGAATTATTCAAGGTATAT
3	42	188200	36	100.0	30	....................................	GCAGCCAATTTTGAAATCAAACACAATGGC
4	43	188266	36	100.0	30	....................................	AAAGAAGCGTAACTCTCTTTTCAAAAGCTC
5	44	188332	36	100.0	30	....................................	ACAAAAGAACAACTAAAAAAAAGCGTTGAA
6	45	188398	36	100.0	30	....................................	TTAACCGATAGAGAGTTATTCTTACTCAGA
7	46	188464	36	100.0	29	....................................	CAATCGGTAGCTATTGCACCGTCTTAGGT
8	47	188529	36	100.0	30	....................................	TTACAGTATGCTCAAGAAATGGGTTATGAG
9	48	188595	36	97.2	30	...................T................	TGTATTGCAGAACCGACACTTGCGGGTGCA
10	49	188661	36	97.2	30	...................T................	CAAAACGAACTTTTAAATATAAAATGTCAT
11	50	188727	36	94.4	29	.......G.G..........................	CTTTTGCAGGTGGTATGATAAGTTTTTTA
12	51	188792	36	100.0	29	....................................	TTGAAAATAAAAAACTTAAATTATTAATC
		188857	36	97.2	0	.................................C..	|
		==========	======	======	======	====================================	==============================
Raw Output Data from CRISPRdetect:
Array 1 188069-188893 **** Predicted by CRISPRDetect 2.1 ***
>unitig_3|quiver Array_Orientation: Forward
Position Repeat %id Spacer Repeat_Sequence Spacer_Sequence Insertion/Deletion
========== ====== ====== ====== ==================================== ============================== ==================
188069 36 94.4 30 .......G.G.......................... GTGGCGGCGTTAGCATTAATATATTACACC
188135 36 100.0 29 .................................... TTACTCAGGTAGAATTATTCAAGGTATAT
188200 36 100.0 30 .................................... GCAGCCAATTTTGAAATCAAACACAATGGC
188266 36 100.0 30 .................................... AAAGAAGCGTAACTCTCTTTTCAAAAGCTC
188332 36 100.0 30 .................................... ACAAAAGAACAACTAAAAAAAAGCGTTGAA
188398 36 100.0 30 .................................... TTAACCGATAGAGAGTTATTCTTACTCAGA
188464 36 100.0 29 .................................... CAATCGGTAGCTATTGCACCGTCTTAGGT
188529 36 100.0 30 .................................... TTACAGTATGCTCAAGAAATGGGTTATGAG
188595 36 97.2 30 ...................T................ TGTATTGCAGAACCGACACTTGCGGGTGCA
188661 36 97.2 30 ...................T................ CAAAACGAACTTTTAAATATAAAATGTCAT
188727 36 94.4 29 .......G.G.......................... CTTTTGCAGGTGGTATGATAAGTTTTTTA
188792 36 100.0 29 .................................... TTGAAAATAAAAAACTTAAATTATTAATC
188857 36 97.2 0 .................................C.. |
========== ====== ====== ====== ==================================== ============================== ==================
13 36 98.5 30 GTTGTTTTTACCTTGCAAACAGCAGGCAGATGCAAC
# Left flank : AAAAATATTTACACCTTTCTCGCCTTTTTTCACCCCTTAAAAGGCGTGTTCCCCCTTTCATTTTTACTTCCCTCAGTTCCATTCCCTTGCTTGTTAATAA
# Right flank : CGCACCTAACCTAACTGTCTGATTCTTATATGTTTTGTTTCTTTCTTTTCCACCAGTATTTTTTTCCTTTCTTATTATGGTTATATAAATTTCGTTGTTG
# Questionable array : NO Score: 4.14
# Score Detail : 1:0, 2:0, 3:0, 4:0.93, 5:0, 6:1, 7:0.21, 8:1, 9:1,
# Score Legend : 1: cas, 2: likely_repeat, 3: motif_match, 4: overall_repeat_identity, 5: one_repeat_cluster, 6: exp_repeat_length, 7:exp_spacer_length, 8: spacer_identity, 9: log(total repeats) - log(total mutated repeats),
# Primary repeat : GTTGTTTTTACCTTGCAAACAGCAGGCAGATGCAAC
# Alternate repeat : NA
# Directional analysis summary from each method:
# Motif ATTGAAA(N) match prediction: NA Score: 0/4.5
# A,T distribution in repeat prediction: NA [Repeat is AT rich:55.56%AT]
# Reference repeat match prediction: NA
# Secondary Structural analysis prediction: R [-4.70,-7.50] Score: 0.37/0.37
# Array degeneracy analysis prediction: F [2-3] Score: 0.41/0.41
# AT richness analysis in flanks prediction: NA [58.3-65.0]%AT Score: 0/0.27
# Longer leader analysis prediction: NA
# ----------------------------------------------------------------------------
# Final direction: F [0.41,0.37 Confidence: LOW]
# Array family : NA
//
Array 1 602421-603239 **** Predicted by CRISPRDetect 2.1 ***
>unitig_0|quiver Array_Orientation: Forward
Position Repeat %id Spacer Repeat_Sequence Spacer_Sequence Insertion/Deletion
========== ====== ====== ====== =============================================== =============================== ==================
602421 47 97.9 30 .....................................C......... ACCCACAATAAGAAGAACTACTATCTGCCT
602498 47 100.0 30 ............................................... TAGCAATGGTGCTATAATATCCTCCAGGCT
602575 47 100.0 30 ............................................... TTGTTGTGTAAAGGAATCGGGTTAAAACCC
602652 47 100.0 30 ............................................... CCAATGATGTGAGCGTGTCTACAGCCGTGT
602729 47 100.0 30 ............................................... AACGTATTCAGTACCTAAAAAACCTAATAC
602806 47 100.0 31 ............................................... GATATCCTAGGTGCTTATAATGATGCCAGAG
602884 47 100.0 30 ............................................... CCCTCTGAAATTTTATTGAAAACTATACAC
602961 47 100.0 30 ............................................... AACTTCCATTTTCATAATGTGTTACTCCTT
603038 47 100.0 30 ............................................... GGGGGCTATACACGCCCCCACGTTGTTTTA
603115 47 100.0 30 ............................................... ACAAAGACGCTGAAAATAACCGTCTTGCCT
603192 47 100.0 0 ............................................... |
========== ====== ====== ====== =============================================== =============================== ==================
11 47 99.8 30 GTTGTGATTAGCTTTAAAATTAGTATCTTTGCATTGGTAAATACAAC
# Left flank : AGCTGATGAGATTTAACAAATATTACAAAAAAAAACAGCTGTCTGAATTGTACAATTATAAAAGTAGGGGTAGTATTATATATAATCACCTAAACAAATT
# Right flank : TCGTCCACTTTATGCCCTTGTAGTTCCTGTGTTGTGATTAGCTTTAAAATTAACGTGAGTTCGATATAAGAAAGTTGTTTTAAAAGTTGTAGGAGTGGAG
# Questionable array : NO Score: 6.53
# Score Detail : 1:0, 2:3, 3:0, 4:0.99, 5:0, 6:0.26, 7:0.28, 8:1, 9:1,
# Score Legend : 1: cas, 2: likely_repeat, 3: motif_match, 4: overall_repeat_identity, 5: one_repeat_cluster, 6: exp_repeat_length, 7:exp_spacer_length, 8: spacer_identity, 9: log(total repeats) - log(total mutated repeats),
# Primary repeat : GTTGTGATTAGCTTTAAAATTAGTATCTTTGCATTGGTAAATACAAC
# Alternate repeat : NA
# Directional analysis summary from each method:
# Motif ATTGAAA(N) match prediction: NA Score: 0/4.5
# A,T distribution in repeat prediction: NA [Repeat is AT rich:72.34%AT]
# Reference repeat match prediction: NA
# Secondary Structural analysis prediction: F [-2.10,-0.40] Score: 0.37/0.37
# Array degeneracy analysis prediction: R [1-0] Score: 0.41/0.41
# AT richness analysis in flanks prediction: F [75.0-61.7]%AT Score: 0.27/0.27
# Longer leader analysis prediction: NA
# ----------------------------------------------------------------------------
# Final direction: F [0.64,0.41 Confidence: LOW]
# Array family : NA
//
Array 2 604299-606580 **** Predicted by CRISPRDetect 2.1 ***
>unitig_0|quiver Array_Orientation: Forward
Position Repeat %id Spacer Repeat_Sequence Spacer_Sequence Insertion/Deletion
========== ====== ====== ====== =============================================== =============================== ==================
604299 46 89.4 30 T..A....C.-.G.................................. TGAATTAAAAGAACGTGGAATAATGCCAAG A,C,AC [604300,604304,604307]
604379 47 100.0 30 ............................................... GTTCCTTTGAGAGTATGGCCTTGCAAAAGC
604456 47 100.0 30 ............................................... CAATTCGGCACAGAAAAATCTTCATAAAGG
604533 47 100.0 29 ............................................... AGGCTTCAGAGTGTTATGTAGCTGTAACA
604609 47 100.0 29 ............................................... CCCATAACTATTTTGTTTTGTCGTTTCCT
604685 47 100.0 30 ............................................... TCGAAGCCTACGCTCGCCACCGCACGGTGG
604762 47 100.0 30 ............................................... CCTTGCCCACTGCATCGCATTGATGCCGTC
604839 47 100.0 30 ............................................... GAACTCCAGTACAACAAACGCATCATAGCC
604916 47 100.0 30 ............................................... CTCGGCAGTCATTTCAACTTTTACTTTGTC
604993 47 100.0 30 ............................................... TTGATAAGTATAAAGACATGCCAAATGTGG
605070 47 100.0 29 ............................................... TGCTGCGTCCTACTTGACTTGCATTTGTA
605146 47 100.0 30 ............................................... ATAATCACCAGATAAGCTTGTATCTACAGG
605223 47 100.0 30 ............................................... ATTTGAAGATTATAATATATCTGATGAAAA
605300 47 100.0 30 ............................................... GTTCTAAATGAGAAATAAATGCGTTTAATT
605377 47 100.0 30 ............................................... TATACCATTATCACAAACAATATTTAATAT
605454 47 100.0 30 ............................................... ATCATTCATTTTCTTAAGTGTATCGATGGT
605531 47 100.0 30 ............................................... CAATTTGTTTTCCAACACTCCACTATCCAT
605608 47 100.0 30 ............................................... GATATTAACGCAAGCGATTTCAACGATGAC
605685 47 100.0 30 ............................................... CCTTAGAGTCTACATAGGTACGAGCAAACC
605762 47 100.0 30 ............................................... CATCAAAGTCAGCGTTTGGGAAGTCGAAAC
605839 47 100.0 30 ............................................... TTCAAAGGAGTGAGTTTCAAACGTTTAGCC
605916 47 100.0 30 ............................................... TCTACATATATCTACTACATTAAACTATCT
605993 47 100.0 30 ............................................... AATGGATAGCTAAATACATGGCATTCATTC
606070 47 100.0 31 ............................................... ACTCTGAAAAGAATAGACCTTTCAGAGGCTC
606148 47 100.0 30 ............................................... TTCACCATAAATAAATTAAATATCCATATA
606225 47 100.0 30 ............................................... AAGGCGGTCGAGCGACCGCTTGATGCGTGC
606302 47 100.0 30 ............................................... AATAGAGAAATCACCAACCTTTAAGAAACT
606379 47 100.0 30 ............................................... TTGATATCATTGGTATTTTTTTCATAATTT
606456 47 100.0 30 ............................................... ATAACACTCTGAAGCCTGATGAAAAGTAGG
606533 47 100.0 0 ............................................... |
========== ====== ====== ====== =============================================== =============================== ==================
30 47 99.6 30 GTTGTGATTAGCTTTAAAATTAGTATCTTTGCATTGGTAAATACAAC
# Left flank : AACAAATCTGATAGCAGGACTCATTGCATACAATCTGTTGCCAAAGAAGCCAGAAATGAACATAGAGATAATTGATAAAAGCAGGATAATTGCATAGAGC
# Right flank : TCAAATAGCTTAAAGCAATGAACATCAGTGTTGTTACGAAAGCTTAGAGAGAAAGAAAAATGCAAGCAAAATAAAGTTCCACTCGTTAAGAATGGAACTT
# Questionable array : NO Score: 6.51
# Score Detail : 1:0, 2:3, 3:0, 4:1.00, 5:0, 6:0.26, 7:0.25, 8:1, 9:1,
# Score Legend : 1: cas, 2: likely_repeat, 3: motif_match, 4: overall_repeat_identity, 5: one_repeat_cluster, 6: exp_repeat_length, 7:exp_spacer_length, 8: spacer_identity, 9: log(total repeats) - log(total mutated repeats),
# Primary repeat : GTTGTGATTAGCTTTAAAATTAGTATCTTTGCATTGGTAAATACAAC
# Alternate repeat : NA
# Directional analysis summary from each method:
# Motif ATTGAAA(N) match prediction: NA Score: 0/4.5
# A,T distribution in repeat prediction: NA [Repeat is AT rich:72.34%AT]
# Reference repeat match prediction: NA
# Secondary Structural analysis prediction: F [-2.10,-0.40] Score: 0.37/0.37
# Array degeneracy analysis prediction: NA [0-0] Score: 0/0.41
# AT richness analysis in flanks prediction: NA [70.0-68.3]%AT Score: 0/0.27
# Longer leader analysis prediction: NA
# ----------------------------------------------------------------------------
# Final direction: F [0.37,0 Confidence: MEDIUM]
# Array family : NA
//
