# Supplementary material for: Restriction-modification mediated barriers to exogenous DNA uptake and incorporation employed by Prevotella intermedia
Source: PLoS One. 2017 Sep 21;12(9):e0185234. doi: 10.1371/journal.pone.0185234 (PMC5608340; doi:10.1371/journal.pone.0185234)
Supplement: S5 Table — (XLSX) [file pone.0185234.s013.xlsx]

## Sheet: Table S5
	Supplementary Table S5: CRISPR systems spacers of P. intermedia 17F
	Chromosome 1
	Array 1 602246..606679		**** Predicted by CRISPRDetect 2.1 ***
	Array_Orientation: Forward
	Spacer Number	Position	Repeat Length	% id to consensus	Spacer Length	Repeat_Sequence	Spacer_Sequence
	==========	==========	======	======	======	===============================================	===============================
			47	99.7	30	GTTGTATTTGCCAATGCAAAGATACTAATTTTAAAGCTAATCACAAC
n=38	==========	==========	======	======	======	===============================================	==============================
1	1	9607	47	100.0	29	...............................................	ATAAAATTTAAAATTATGCAAACTTTTTT
2	2	9683	47	100.0	29	...............................................	GGACAACTTCAAAAAGTTATCTTTCAGCG
3	3	9759	47	100.0	30	...............................................	CGCCCTATCGTCATTTCAATGCCACCGAGT
4	4	9836	47	100.0	29	...............................................	CAAAAGCGGTCGTAAGGGCTTTTATCCCG
5	5	9912	47	100.0	29	...............................................	TGGTGCAACCAAGTGGAGCGTATATTGTA
6	6	9988	47	100.0	30	...............................................	TATCAAATACAGGCGCATACTCCTTGTACA
7	7	10065	47	100.0	30	...............................................	TTTCTTCAAATAATTTCCTGTGCCTACGTT
8	8	10142	47	100.0	29	...............................................	TTTTTCGTTTCGTTCACACGTTGATATTC
9	9	10218	47	100.0	30	...............................................	CCTGCTCTACTTGTTGTATAGTTTCGTTCT
10	10	10295	47	100.0	30	...............................................	AGGAAAGAATAAACAGTGCTTGGAAATAAT
11	11	10372	47	100.0	30	...............................................	CGCCTCAACATTGCCAATATCCTCTCTCTA
12	12	10449	47	100.0	30	...............................................	CTTAGGTATGTTAGTTAGTGGTGCTGTTGG
13	13	10526	47	100.0	29	...............................................	GGCTATGCGCTCGATGCATATAATACTAA
14	14	10602	47	100.0	30	...............................................	CACAGACACATCAATAATAGTAACTTTCTC
15	15	10679	47	100.0	30	...............................................	GCGGGTGCAGCACTTGCCTACTTATACACA
16	16	10756	47	100.0	30	...............................................	TTGAAAATTATTGACATTAAAGGAAAGGGC
17	17	10833	47	100.0	29	...............................................	ATTTAATCTAAAACTTTCATATTTATTTA
18	18	10909	47	100.0	30	...............................................	CACGTGTAACGATAGCACAGTTTCCGTCCT
19	19	10986	47	100.0	30	...............................................	CTGCCACCGTAACAACGTTTGAGCCATTAA
20	20	11063	47	100.0	30	...............................................	AATAAACTGTAATACTTCTTTTAGGTCTAC
21	21	11140	47	100.0	30	...............................................	TATACGACCAAATATTGAAGCAGAACCTTA
22	22	11217	47	100.0	30	...............................................	TGACGCTATGGGTTACGAACTTACCCCAAT
23	23	11294	47	100.0	30	...............................................	GGAAAGATGTTGTTGTATTGCTTGCTGCAG
24	24	11371	46	97.9	30	................................-..............	CAACAACGTTAAAAAGTGGCAACCCATTTA
25	25	11447	47	100.0	30	...............................................	GCCCGTCAAATACTCGGCTTAGCTTATCAA
26	26	11524	47	100.0	30	...............................................	CCACTCGAAAAAGGTAGTATCGGACGAAGA
27	27	11601	47	100.0	30	...............................................	AAGCTCAAAGCCTTTACAATGCTGCTATTA
28	28	11678	47	100.0	29	...............................................	AGGGGATTTAATAATGACATACCACTAGT
29	29	11754	47	100.0	29	...............................................	CGATTGTTTTCTCGTCGCCTTTCACGAGT
30	30	11830	47	100.0	30	...............................................	GGAAACATAAAACCTAAATTCATATCCTTT
31	31	11907	47	100.0	30	...............................................	TGTCAGCCTTTCCGTATTTGTCCTTTGGCA
32	32	11984	47	100.0	30	...............................................	TTCTATTTGGTCTGATAATTTAAATTATGG
33	33	12061	47	100.0	30	...............................................	GGTTATTCTCTCGACCCTAATTGTCAGAAT
34	34	12138	47	100.0	30	...............................................	ATGCCGAAGATGTAAGTAATGGTAGTGCCA
35	35	12215	47	100.0	30	...............................................	TAAAAATTTATATTGAAAAGATATGATAAA
36	36	12292	47	100.0	30	...............................................	AAACAGTCTTTGAAAATCTTGTGAAAATGC
37	37	12369	47	100.0	29	...............................................	GACTATGGTATCTTCGTTATCGTCTACTT
38	38	12445	47	97.9	30	.........A.....................................	AACCTCCGAGCACATTACGAAATGCCTACT
		12522	46	91.5	0	.........A...............C....C......-.........	|
		==========	======	======	======	===============================================	==============================
	Chromosome 2
	Array 1 188069-188893		**** Predicted by CRISPRDetect 2.1 ***
	Array_Orientation: Forward
	Spacer Number	Position	Repeat Length	% id to consensus	Spacer Length	Repeat_Sequence	Spacer_Sequence
	==========	==========	======	======	======	===============================================	===============================
n=15			36	98.5	30	GTTGCATCTGCCTGCTGTTTGCAAGGTAAAAACAAC	==============================
	==========	==========	======	======	======	====================================
1	39	347676	36	100.0	29	....................................	TAGCGTTTGCGTCTACGTTTTCCATAGCC
2	40	347611	36	100.0	29	....................................	ACATCAACTACAAAGCGATAATCTAATAA
3	41	347546	36	100.0	30	....................................	TTCTTAATAGTTCTATTCTTGCTCCTGTAT
4	42	347480	36	97.2	30	....T...............................	AATTCTTGATATAGTTCTATTATAGTATCT
5	43	347414	36	97.2	30	....T...............................	ACCTTAAGGTCCTTTACGCTCTTAGCACCA
6	44	347348	36	97.2	30	....T...............................	ACTCTGGCAAGAACAAGTTCGTAACCATAC
7	45	347282	36	97.2	30	....T...............................	CAAGAGTACGTTAGCAATGAAAGTAGTAAG
8	46	347216	36	97.2	30	....T...............................	ATTACATGTGGTTAACTCATCTAAGAACAA
9	47	347150	36	97.2	28	....T...............................	TTATTTGTTTTGTGGCACAATTGACCTA
10	48	347086	36	100.0	29	....................................	TTGTTGGCAATGAGCTCGTTCACTTTACC
11	49	347021	36	100.0	30	....................................	GATTTTAATTTTTCCTCAATATTTGTTTCT
12	50	346955	36	100.0	30	....................................	TCACTCCAATCTTTAACAGTGTGATAATAA
13	51	346889	36	100.0	29	....................................	TCCTTAACAATACGTGAAAGTAGATAAAA
14	52	346824	36	100.0	29	....................................	CCTATGGTAATGTACTCTTTTAGAACACA
15	53	346759	36	100.0	30	....................................	TCAGCGAGAATTTTAGCTTCAAACTCAGCT
16	54	346693	36	97.2	30	................................T...	AGCATTCCAATAGCGGAAGGACTGATTTTT
		346627	36	94.4	0	..........................C.C.......	|
		==========	======	======	======	====================================	==============================
Raw Output Data from CRISPRdetect:
Array 1 2111197-2114161		**** Predicted by CRISPRDetect 2.1 ***
>unitig_0|quiver		Array_Orientation: Forward
Position	Repeat	%id	Spacer	Repeat_Sequence	Spacer_Sequence	Insertion/Deletion
==========	======	======	======	===============================================	==============================	==================
2111197	47	100.0	29	...............................................	ATAAAATTTAAAATTATGCAAACTTTTTT
2111273	47	100.0	29	...............................................	GGACAACTTCAAAAAGTTATCTTTCAGCG
2111349	47	100.0	30	...............................................	CGCCCTATCGTCATTTCAATGCCACCGAGT
2111426	47	100.0	29	...............................................	CAAAAGCGGTCGTAAGGGCTTTTATCCCG
2111502	47	100.0	29	...............................................	TGGTGCAACCAAGTGGAGCGTATATTGTA
2111578	47	100.0	30	...............................................	TATCAAATACAGGCGCATACTCCTTGTACA
2111655	47	100.0	30	...............................................	TTTCTTCAAATAATTTCCTGTGCCTACGTT
2111732	47	100.0	29	...............................................	TTTTTCGTTTCGTTCACACGTTGATATTC
2111808	47	100.0	30	...............................................	CCTGCTCTACTTGTTGTATAGTTTCGTTCT
2111885	47	100.0	30	...............................................	AGGAAAGAATAAACAGTGCTTGGAAATAAT
2111962	47	100.0	30	...............................................	CGCCTCAACATTGCCAATATCCTCTCTCTA
2112039	47	100.0	30	...............................................	CTTAGGTATGTTAGTTAGTGGTGCTGTTGG
2112116	47	100.0	29	...............................................	GGCTATGCGCTCGATGCATATAATACTAA
2112192	47	100.0	30	...............................................	CACAGACACATCAATAATAGTAACTTTCTC
2112269	47	100.0	30	...............................................	GCGGGTGCAGCACTTGCCTACTTATACACA
2112346	47	100.0	30	...............................................	TTGAAAATTATTGACATTAAAGGAAAGGGC
2112423	47	100.0	30	...............................................	ATTTAATCTAAAAACTTTCATATTTATTTA
2112500	47	100.0	30	...............................................	CACGTGTAACGATAGCACAGTTTCCGTCCT
2112577	47	100.0	30	...............................................	CTGCCACCGTAACAACGTTTGAGCCATTAA
2112654	47	100.0	30	...............................................	AATAAACTGTAATACTTCTTTTAGGTCTAC
2112731	47	100.0	30	...............................................	TATACGACCAAATATTGAAGCAGAACCTTA
2112808	47	100.0	30	...............................................	TGACGCTATGGGTTACGAACTTACCCCAAT
2112885	47	100.0	30	...............................................	GGAAAGATGTTGTTGTATTGCTTGCTGCAG
2112962	47	100.0	30	...............................................	CAACAACGTTAAAAAGTGGCAACCCATTTA
2113039	47	100.0	30	...............................................	GCCCGTCAAATACTCGGCTTAGCTTATCAA
2113116	47	100.0	30	...............................................	CCACTCGAAAAAGGTAGTATCGGACGAAGA
2113193	47	100.0	30	...............................................	AAGCTCAAAGCCTTTACAATGCTGCTATTA
2113270	47	100.0	30	...............................................	AGGGGATTTAATAATGACATACCACTAGGT
2113347	47	100.0	29	...............................................	CGATTGTTTTCTCGTCGCCTTTCACGAGT
2113423	47	100.0	30	...............................................	GGAAACATAAAACCTAAATTCATATCCTTT
2113500	47	100.0	30	...............................................	TGTCAGCCTTTCCGTATTTGTCCTTTGGCA
2113577	47	100.0	30	...............................................	TTCTATTTGGTCTGATAATTTAAATTATGG
2113654	47	100.0	30	...............................................	GGTTATTCTCTCGACCCTAATTGTCAGAAT
2113731	47	100.0	30	...............................................	ATGCCGAAGATGTAAGTAATGGTAGTGCCA
2113808	47	100.0	30	...............................................	TAAAAATTTATATTGAAAAGATATGATAAA
2113885	47	100.0	30	...............................................	AAACAGTCTTTGAAAATCTTGTGAAAATGC
2113962	47	100.0	29	...............................................	GACTATGGTATCTTCGTTATCGTCTACTT
2114038	47	97.9	30	.........A.....................................	AACCTCCGAGCACATTACGAAATGCCTACT
2114115	46	91.5	0	.........A...............C....C......-.........	|
==========	======	======	======	===============================================	==============================	==================
39	47	99.7	30	GTTGTATTTGCCAATGCAAAGATACTAATTTTAAAGCTAATCACAAC
# Left flank : AAGTTCCATTCTTGACGAGTGGAACTTTATTTTGCTTGCATTTTTCTTTCTCTCTAAGCTTTCGTAACAATACTGATGTTCATTACTTTAATCTACTTGA
# Right flank : TAACGACACTTCCGATTTATTGTTCTAAAATCAAGTAAATGGGGCAATAAATTTAACACAAGCGAAAAGGGGAAAATAGAGAAAAAGAGAGCTGGAAAAT
# Questionable array : NO	Score: 6.48
#	Score Detail : 1:0, 2:3, 3:0, 4:0.99, 5:0, 6:0.26, 7:0.23, 8:1, 9:1,
#	Score Legend : 1: cas, 2: likely_repeat, 3: motif_match, 4: overall_repeat_identity, 5: one_repeat_cluster, 6: exp_repeat_length, 7:exp_spacer_length, 8: spacer_identity, 9: log(total repeats) - log(total mutated repeats),
# Primary repeat : GTTGTATTTGCCAATGCAAAGATACTAATTTTAAAGCTAATCACAAC
# Alternate repeat : NA
# Directional analysis summary from each method:
#	Motif ATTGAAA(N) match prediction: NA Score: 0/4.5
#	A,T distribution in repeat prediction: NA [Repeat is AT rich:70.21%AT]
#	Reference repeat match prediction: NA
#	Secondary Structural analysis prediction: R [-2.80,-4.10] Score: 0.37/0.37
#	Array degeneracy analysis prediction: F [0-5] Score: 0.41/0.41
#	AT richness analysis in flanks prediction: NA [71.7-70.0]%AT Score: 0/0.27
#	Longer leader analysis prediction: NA
#	----------------------------------------------------------------------------
#	Final direction: F [0.41,0.37 Confidence: LOW]
# Array family : NA
//
Array 2 347676-346591		**** Predicted by CRISPRDetect 2.1 ***
>unitig_1|quiver		Array_Orientation: Reverse
Position	Repeat	%id	Spacer	Repeat_Sequence	Spacer_Sequence	Insertion/Deletion
==========	======	======	======	====================================	==============================	==================
347676	36	100.0	29	....................................	TAGCGTTTGCGTCTACGTTTTCCATAGCC
347611	36	100.0	29	....................................	ACATCAACTACAAAGCGATAATCTAATAA
347546	36	100.0	30	....................................	TTCTTAATAGTTCTATTCTTGCTCCTGTAT
347480	36	97.2	30	....T...............................	AATTCTTGATATAGTTCTATTATAGTATCT
347414	36	97.2	30	....T...............................	ACCTTAAGGTCCTTTACGCTCTTAGCACCA
347348	36	97.2	30	....T...............................	ACTCTGGCAAGAACAAGTTCGTAACCATAC
347282	36	97.2	30	....T...............................	CAAGAGTACGTTAGCAATGAAAGTAGTAAG
347216	36	97.2	30	....T...............................	ATTACATGTGGTTAACTCATCTAAGAACAA
347150	36	97.2	28	....T...............................	TTATTTGTTTTGTGGCACAATTGACCTA
347086	36	100.0	29	....................................	TTGTTGGCAATGAGCTCGTTCACTTTACC
347021	36	100.0	30	....................................	GATTTTAATTTTTCCTCAATATTTGTTTCT
346955	36	100.0	30	....................................	TCACTCCAATCTTTAACAGTGTGATAATAA
346889	36	100.0	29	....................................	TCCTTAACAATACGTGAAAGTAGATAAAA
346824	36	100.0	29	....................................	CCTATGGTAATGTACTCTTTTAGAACACA
346759	36	100.0	30	....................................	TCAGCGAGAATTTTAGCTTCAAACTCAGCT
346693	36	97.2	30	................................T...	AGCATTCCAATAGCGGAAGGACTGATTTTT
346627	36	94.4	0	..........................C.C.......	|
==========	======	======	======	====================================	==============================	==================
17	36	98.5	30	GTTGCATCTGCCTGCTGTTTGCAAGGTAAAAACAAC
# Left flank : AAAACAACGAGATTTACAATTAGATAATAAGAAGGGGAAAAAATGGTGTTGGAAAAGAAAGAAACAAAACATATAAGAATCAGACAGTTAGGTTAGGTGC
# Right flank : TTATTAACAAGCAAGGGAATGGAATTGGGGGAAGTAAAAACGGAAGGGGGAACACGCCTTTCTATGGGTGAAAAAAGGCGAGAAAGGTGTAAATATTTTT
# Questionable array : NO	Score: 4.02
#	Score Detail : 1:0, 2:0, 3:0, 4:0.93, 5:0, 6:1, 7:0.20, 8:1, 9:0.89,
#	Score Legend : 1: cas, 2: likely_repeat, 3: motif_match, 4: overall_repeat_identity, 5: one_repeat_cluster, 6: exp_repeat_length, 7:exp_spacer_length, 8: spacer_identity, 9: log(total repeats) - log(total mutated repeats),
# Primary repeat : GTTGCATCTGCCTGCTGTTTGCAAGGTAAAAACAAC
# Alternate repeat : GTTGTATCTGCCTGCTGTTTGCAAGGTAAAAACAAC
# Directional analysis summary from each method:
#	Motif ATTGAAA(N) match prediction: NA Score: 0/4.5
#	A,T distribution in repeat prediction: NA [Repeat is AT rich:55.56%AT]
#	Reference repeat match prediction: NA
#	Secondary Structural analysis prediction: R [-4.70,-7.50] Score: 0.37/0.37
#	Array degeneracy analysis prediction: R [3-0] Score: 0.41/0.41
#	AT richness analysis in flanks prediction: R [55.0-66.7]%AT Score: 0.27/0.27
#	Longer leader analysis prediction: NA
#	----------------------------------------------------------------------------
#	Final direction: R [0,1.05 Confidence: HIGH]
# Array family : NA
//
