# Supplementary material for: Restriction-modification mediated barriers to exogenous DNA uptake and incorporation employed by Prevotella intermedia
Source: PLoS One. 2017 Sep 21;12(9):e0185234. doi: 10.1371/journal.pone.0185234 (PMC5608340; doi:10.1371/journal.pone.0185234)
Supplement: S6 Table — (XLSX) [file pone.0185234.s014.xlsx]

## Sheet: Table S6
Supplementary Table S6: CRISPR system protospacers of P. intermedia ATCC25611F and 17F
Genome	Spacer Number	Description of protospacer	Accession number	Position of protospacer	Similarity to spacer	Protospacer 5' flanking region (5'-3')	Protospacer 3' flanking region (5'-3')
P. intermedia 17F Chr. I Array: 2111197-2114161	1	Methanobrevibacter millerae strain SM9, complete genome	NZ_CP011266.1	713470-713498	0.9	TGGAGGATAATAATAAAAAT	CATCATGTTCATCCTTTTTA
	17	Methanobrevibacter wolinii SH T523DRAFT_scaffold00010.10_C, whole genome shotgun sequence	NZ_JHWX01000015.1	42055-42084	0.87	ATATAAAAGAAAAACAAAGT	AATTTTAATTTAAATAAATA
	20	Lactococcus bacteriophage 5440, E2 (E2), E3 (E3), E1 (E1), and L1 (L1) genes, partial cds	AY129506	921-892	0.87	ACACCGTAGTCAGTTTTAGA	TTCATCATTAACAAAATAGA
	35	Acidiplasma cupricumulans JCM 13668 DNA, contig: JCM13668.contig00003	NZ_BBDK01000003.1	61360-61389	0.87	AACACAGGCAGTTGCTGGTT	CTTATGCATTATTTTTATTT
P. intermedia 17F Chr. II Array: 347676-346591	49	Methanosarcina sp. Kolksee, complete genome	NZ_CP009524.1	3065012-3065040	0.87	ATCGTATCCAGATGACCTAA	TTTACATAATCGTTCCAAAA
	53	Methanosarcina thermophila TM-1, complete genome	NZ_CP009501.1	103658-103629	0.87	AAATAACAGTAGGATCTAAT	CTGATTCCTGTAGATAATCA
P. intermedia ATCC25611F Chr. I Array: 2111197-2114161	17	Methanotorris igneus Kol 5, complete genome	NC_015562.1	1610365-1610336	0.87	TTACATTTAAATTACATAAC	ATGTTATGAAGTGTCTATTT
P. intermedia ATCC25611F Chr. II Array: 347676-346591	44	Geobacillus virus E2, vir_81185_GID_5247228	NC_009552.2	188368-188397	0.87	GTGTTTAAATATTGGTCAAA	AGAGTACGTGGACTGCTTGC
	49	Methanosarcina sp. 2.H.A.1B.4 scaffold27_1_size48144-refined, whole genome shotgun sequence	NZ_JJOV01000019.1	29797-29769	0.87	AACTATAAAAATTAAAAAAA	GTACCATAAGCCTAATTTAA
